# Supplementary material
Source: MDPI journal article supplement (https://www.mdpi.com/2079-9292/12/3/688)
Supplement: s1 [file s1]

# Supplementary Materials: High-Performance of Amorphous InGaSnO Thin-Film Transistor with ZrAlO<sub>x</sub> Gate Insulator by Spray Pyrolysis

Yeoungjin Chang, Ravindra Naik Bukke, Youngoo Kim, Kiwan Ahn, Jinbaek Bae and Jin Jang

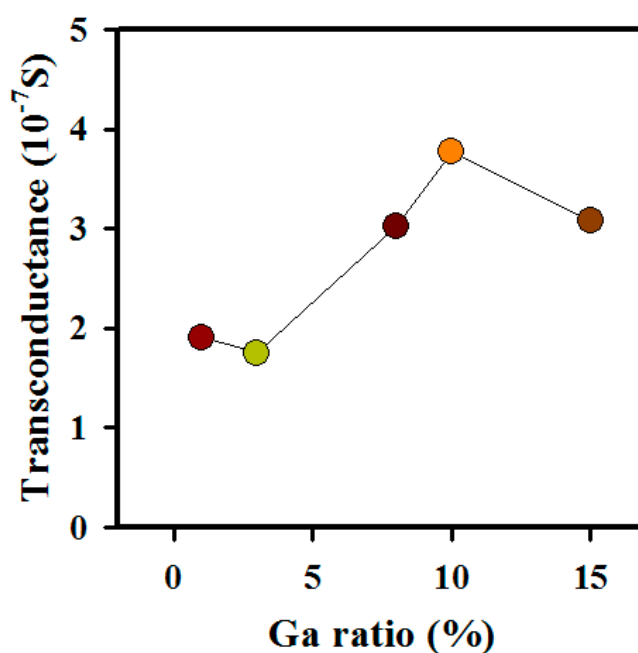

**Figure S1.** The transconductance ( $g_m$ ,  $\Delta I_D/\Delta V_G$ ) of the IGTO TFTs with different Ga ratio (1, 3, 8, 10, and 15%).

**Table S1.** Summary of the deconvoluted O1s XPS spectra for the (1, 3, 8, 10, and 15) IGTO films. M-O, V<sub>o</sub>, and -OH represents metal-oxide, oxygen vacancy, and hydroxyl group, respectively.

| Ga ratio (%) | M-O-M (%) | V <sub>o</sub> (%) | M-OH (%) |
|--------------|-----------|--------------------|----------|
| 1            | 56.67     | 32.34              | 10.99    |
| 3            | 61.16     | 28.42              | 10.42    |
| 8            | 63.01     | 28.12              | 8.87     |
| 10           | 69.22     | 23.59              | 7.19     |
| 15           | 61.86     | 28.11              | 10.03    |
